# Supplementary figures and images for: Effect of a low-salt diet on chronic kidney disease outcomes: a systematic review and meta-analysis
Source: HighWire-hosted journal article supplement (doi:10.1136/bmjopen-2021-050843), 2022-01-01

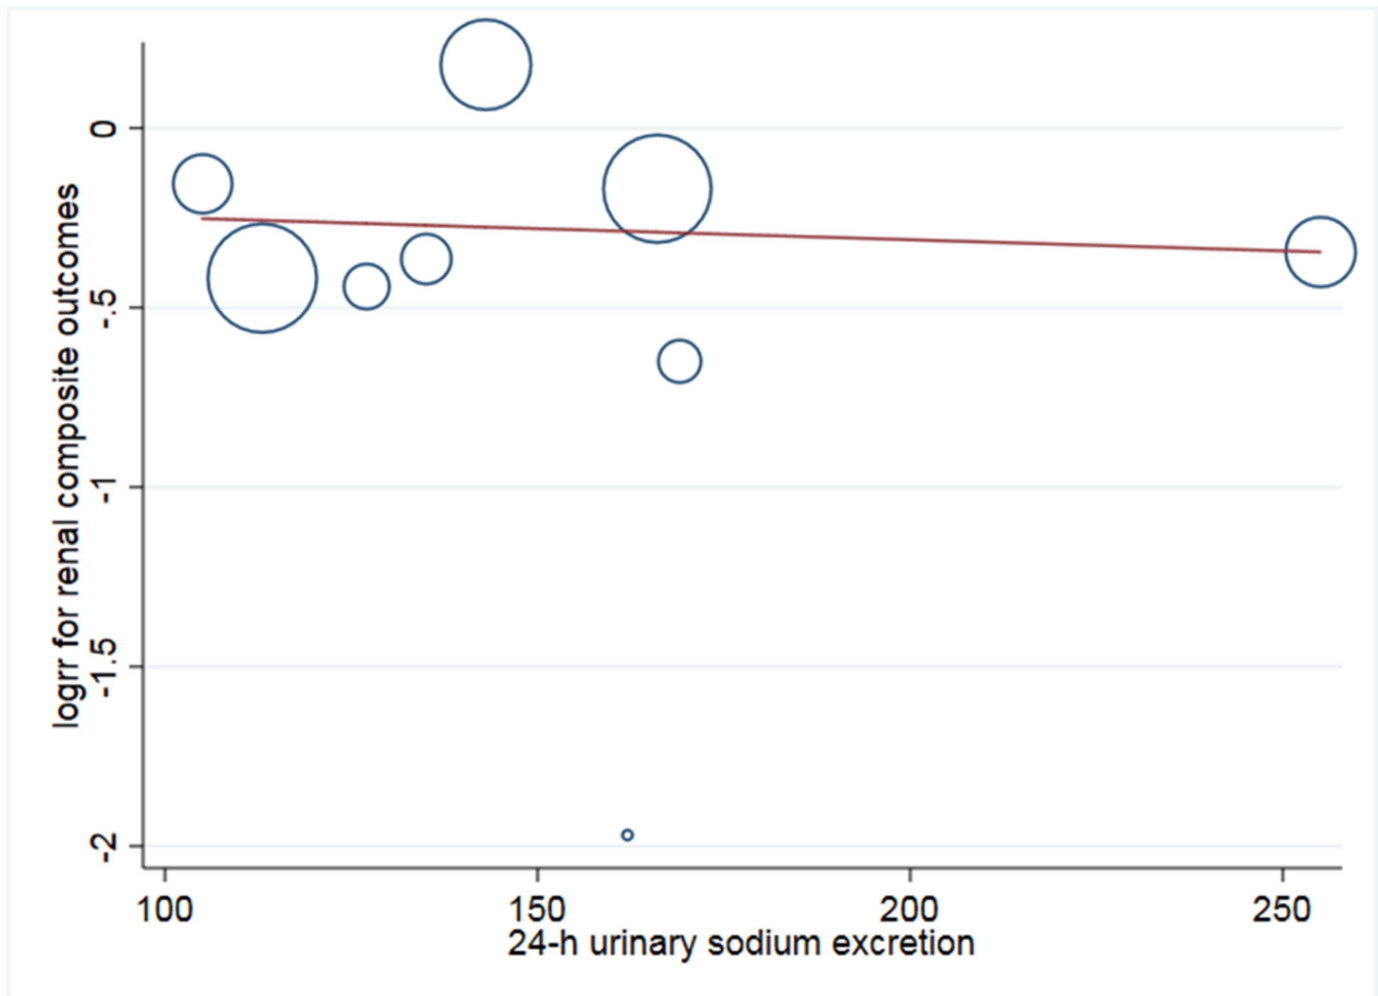

Supplementary file 7

Supplement: bmjopen-2021-050843supp007_data_supplement.pdf [file bmjopen-2021-050843supp007_data_supplement.pdf]

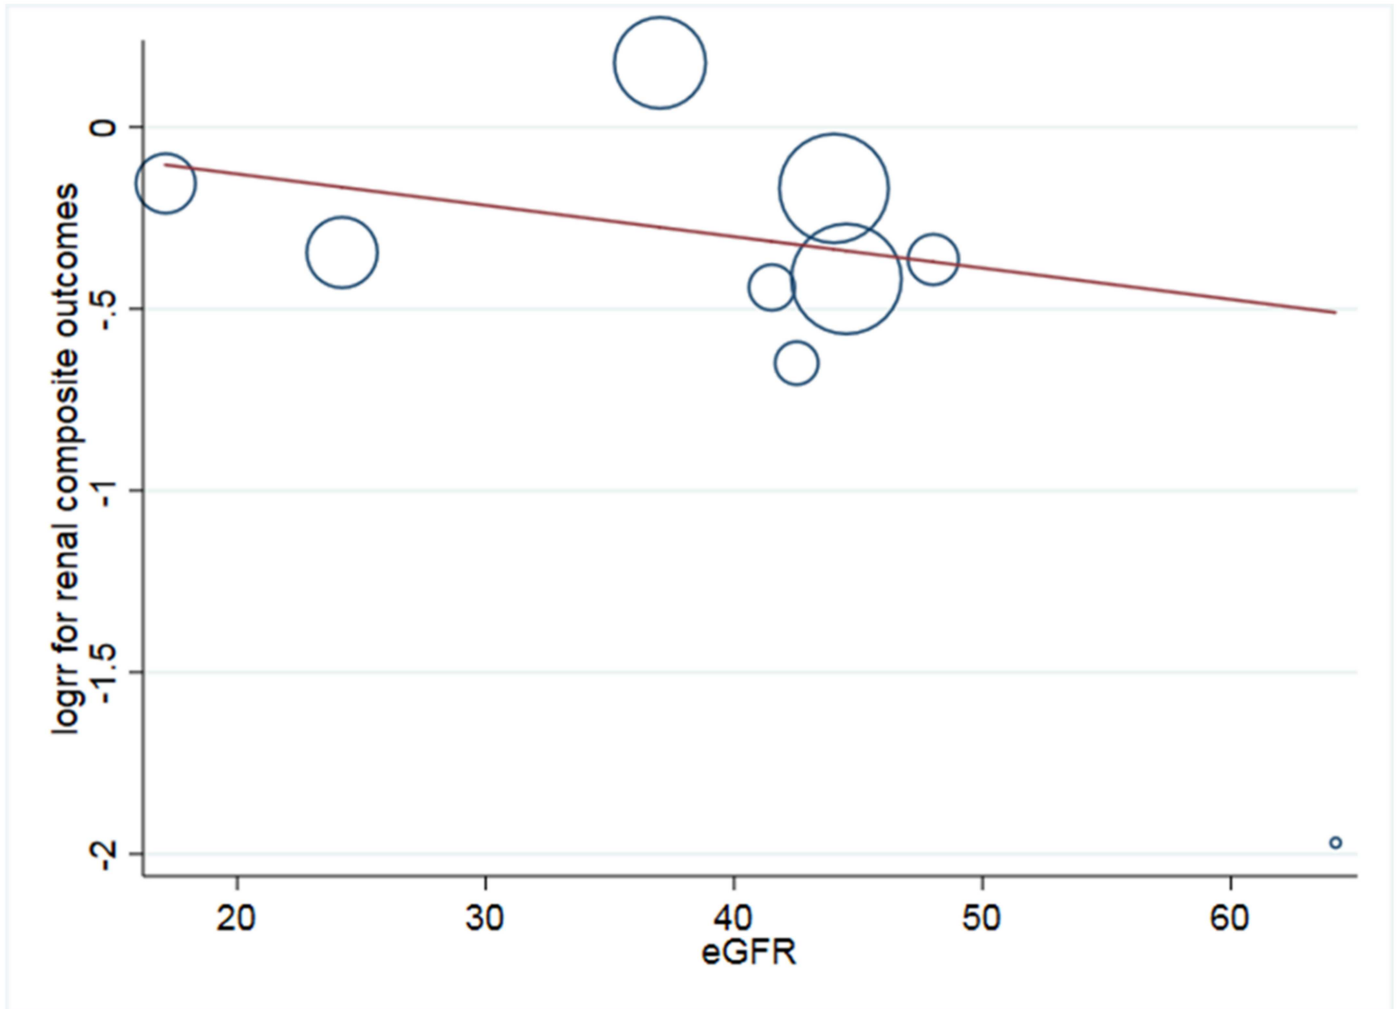

Supplementary file 8

Supplement: bmjopen-2021-050843supp008_data_supplement.pdf [file bmjopen-2021-050843supp008_data_supplement.pdf]
